# Supplementary material for: Developing a scoring framework for curriculum viability indicators to assess the survival of a curriculum
Source: Research Square preprint supplement (doi:10.21203/rs.3.rs-3890628/v1), 2024-01-29
Supplement: Supplementary file 1 [file 23b31516054311ebb36dcf31.pdf]

# Curriculum Viability Teacher questionnaire

**Authors:** Rehan Ahmed Khan<sup>1,2</sup>, Annemarie Spruijt<sup>3</sup>, Usman Mahboob<sup>4</sup> Mohamed Al Eraky<sup>5</sup> Jeroen J. G. van Merrienboer<sup>2</sup>

- 1 Islamic International Medical College, Riphah International University, Rawalpindi, Pakistan
  - 2 School of Health Professions Education, Maastricht University, Maastricht, the Netherlands.
  - 3 Faculty of Veterinary Medicine, Utrecht University, Utrecht, the Netherlands.
  - 4 Institute of Health Professions Education and Research, Khyber Medical University Peshawar, Pakistan
  - 5 Imam Abdulrahman Bin Faisal University, Saudi Arabia
-

Name of the participant (optional)

---

Department (Select one)

- Basic Sciences
- Clinical Sciences
- Para Clinical

Designation (Select one)

- Professor
- Assoc. Professor
- Assistant Professor
- Senior Registrar / Senior Lecturer
- PG Trainee / Lecturer / Medical Officer

Experience (Select one)

- less than 5 years
- 5-10 years
- 11-15 years
- 16-20 years
- more than 20 years

---

Qualification in medical education (Select one)

- PhD Medical Education
- Master's in medical education
- Diploma in Medical Education
- Certificate in Medical Education
- Workshops
- None

---

Are you involved in the development of the curriculum?

- yes
- no

---

Are you a module coordinator or module director?

- yes
  - no
-

| <b>1-Educational Program (EP) Inhibitor</b>     |                                                                                                                                                                                  |   |   |   |   |   |
|-------------------------------------------------|----------------------------------------------------------------------------------------------------------------------------------------------------------------------------------|---|---|---|---|---|
| 1                                               | The contents I teach to my students are relevant to the intended learning outcomes of the curriculum (e.g., doctor as a professional, leader, communicator, researcher, etc.). * | 5 | 4 | 3 | 2 | 1 |
| 2                                               | In my institution, the content taught in one course/module helps the students to understand the related concepts in other courses/modules. *                                     | 5 | 4 | 3 | 2 | 1 |
| 3                                               | The curricular content taught in my institution contributes to making students good doctors. *                                                                                   | 5 | 4 | 3 | 2 | 1 |
| 4                                               | I use different assessment tools to assess knowledge, skills, and attitude in a course. *                                                                                        | 5 | 4 | 3 | 2 | 1 |
| 5                                               | I construct assessment items according to the blueprinting for an exam. *                                                                                                        | 5 | 4 | 3 | 2 | 1 |
| 6                                               | I provide regular constructive feedback to my students.                                                                                                                          | 5 | 4 | 3 | 2 | 1 |
| <b>2-Disciplinary culture (DC) Inhibitor</b>    |                                                                                                                                                                                  |   |   |   |   |   |
| 7                                               | The attendance of faculty on campus is strictly monitored through biometric thumb impressions.                                                                                   | 5 | 4 | 3 | 2 | 1 |
| 8                                               | Students are fined if they do not adhere to institution policies. *                                                                                                              | 5 | 4 | 3 | 2 | 1 |
| <b>3-Social interaction (SI) Inhibitor</b>      |                                                                                                                                                                                  |   |   |   |   |   |
| 9                                               | My institution offers formal opportunities for enhancing social interaction on educational issues among students.                                                                | 5 | 4 | 3 | 2 | 1 |
| 10                                              | My institution provides interactive online discussion forums. *                                                                                                                  | 5 | 4 | 3 | 2 | 1 |
| 11                                              | My institution has meeting places for students and teachers for interaction. *                                                                                                   | 5 | 4 | 3 | 2 | 1 |
| <b>4-Institutional policies (IP) Inhibitor</b>  |                                                                                                                                                                                  |   |   |   |   |   |
| 12                                              | Faculty can appeal against institutional decisions without any fear.                                                                                                             | 5 | 4 | 3 | 2 | 1 |
| 13                                              | My institution's decisions are based on defined policies and procedures.                                                                                                         | 5 | 4 | 3 | 2 | 1 |
| 14                                              | I have been provided with a clear job description.                                                                                                                               | 5 | 4 | 3 | 2 | 1 |
| 15                                              | My institution gives awards for educational innovation (e.g., development of a new assessment tool, teaching method etc.)                                                        | 5 | 4 | 3 | 2 | 1 |
| 16                                              | My teaching and research activities are considered equally important for my promotion.                                                                                           | 5 | 4 | 3 | 2 | 1 |
| <b>5-Communication Practices (CP) Inhibitor</b> |                                                                                                                                                                                  |   |   |   |   |   |
| 17                                              | In my institution, there are no restrictions on the use of social media such as YouTube, WhatsApp etc. for educational purposes.                                                 | 5 | 4 | 3 | 2 | 1 |
| 18                                              | In my institution, regular faculty meetings are held at the departmental level where everyone has the right to voice their concerns.                                             | 5 | 4 | 3 | 2 | 1 |
| 19                                              | In my institution, the curriculum managers clearly communicate educational changes to the faculty.                                                                               | 5 | 4 | 3 | 2 | 1 |
| 20                                              | In my institution, the faculty share strategies for effective classroom management among themselves.                                                                             | 5 | 4 | 3 | 2 | 1 |
| 21                                              | In my institution, the faculty share their experiences of various instructional designs (e.g., 4C ID, Gagne 9 events) amongst them.                                              | 5 | 4 | 3 | 2 | 1 |

|                                             |                                                                                                                  |   |   |   |   |   |
|---------------------------------------------|------------------------------------------------------------------------------------------------------------------|---|---|---|---|---|
| 22                                          | My institutional management shares the educational courses/modules in the curriculum with the faculty.           | 5 | 4 | 3 | 2 | 1 |
| <b>6-Faculty involvement (FI) Inhibitor</b> |                                                                                                                  |   |   |   |   |   |
| 23                                          | I am invited to the meetings in which curricular issues are discussed and decisions are made.                    | 5 | 4 | 3 | 2 | 1 |
| 24                                          | My suggestions to update a course/module are given due consideration by committees that make curricular changes. | 5 | 4 | 3 | 2 | 1 |
| 25                                          | I have the authority to update the content of course/module in the curriculum.                                   | 5 | 4 | 3 | 2 | 1 |

- Strongly agree (5)
- Somewhat agree (4)
- Neither agree nor disagree (3)
- Somewhat disagree (2)
- Strongly disagree (1)
