# Supplementary material for: Developing a scoring framework for curriculum viability indicators to assess the survival of a curriculum
Source: Research Square preprint supplement (doi:10.21203/rs.3.rs-3890628/v1), 2024-01-29
Supplement: Supplementary file 2 [file a4a1e2799be1e8e9cc39e9da.pdf]

# Curriculum Viability Student Questionnaire

---

**Authors:** Rehan Ahmed Khan<sup>1,2</sup>, Annemarie Spruijt<sup>3</sup>, Usman Mahboob<sup>4</sup> Mohamed Al Eraky<sup>5</sup>  
Jeroen J. G. van Merrienboer<sup>2</sup>

- 1 Islamic International Medical College, Riphah International University, Rawalpindi, Pakistan
- 2 School of Health Professions Education, Maastricht University, Maastricht, the Netherlands.
- 3 Faculty of Veterinary Medicine, Utrecht University, Utrecht, the Netherlands.
- 4 Institute of Health Professions Education and Research, Khyber Medical University Peshawar, Pakistan
- 5 Imam Abdulrahman Bin Faisal University, Saudi Arabia

Name of the participant (optional)

---



---

| <b>1-Educational Program (EP) Inhibitor</b> |                                                                                                                                                                        |   |   |   |   |   |
|---------------------------------------------|------------------------------------------------------------------------------------------------------------------------------------------------------------------------|---|---|---|---|---|
| 1                                           | The contents taught to me are relevant to the intended learning outcomes of the curriculum (e.g., doctor as a professional, leader, communicator, researcher, etc.). * | 5 | 4 | 3 | 2 | 1 |
| 2                                           | In my institution, the content taught to me in one course/module helps me to understand the related concepts in other courses/modules. *                               | 5 | 4 | 3 | 2 | 1 |
| 3                                           | The curricular content taught in my institution contributes to making students good doctors*                                                                           | 5 | 4 | 3 | 2 | 1 |
| 4                                           | I am assessed according to intended learning outcomes of the course*                                                                                                   | 5 | 4 | 3 | 2 | 1 |
| 5                                           | My institution uses multiple assessment tools for the assessment of students*                                                                                          | 5 | 4 | 3 | 2 | 1 |
|                                             |                                                                                                                                                                        |   |   |   |   |   |
| 1                                           | My institution offers appropriate Information Communications Technology facilities (e.g., the Internet, computers, software, etc.) for students                        | 5 | 4 | 3 | 2 | 1 |
| 2                                           | My institution has an appropriate infrastructure that supports educational activities such as lectures, PBL sessions, skill acquisition, etc.                          | 5 | 4 | 3 | 2 | 1 |
| 3                                           | My institution has adequate support services such as counselling, scholarships, etc. for students                                                                      | 5 | 4 | 3 | 2 | 1 |
| 4                                           | In my institution, student's evaluation of the assessments/examinations is considered important for making changes in them                                             | 5 | 4 | 3 | 2 | 1 |
| 5                                           | In my institution, students are encouraged to ask questions during teaching sessions                                                                                   | 5 | 4 | 3 | 2 | 1 |
|                                             |                                                                                                                                                                        |   |   |   |   |   |
| 1                                           | Students are fined if they do not adhere to institution policies*                                                                                                      | 5 | 4 | 3 | 2 | 1 |
| 2                                           | Student attendance is strictly monitored through biometric thumb impression in my institution                                                                          | 5 | 4 | 3 | 2 | 1 |
| 3                                           | My institution provides opportunities for social interaction between students and teachers*                                                                            | 5 | 4 | 3 | 2 | 1 |
| 4                                           | My institution provides online interactive discussion groups*                                                                                                          | 5 | 4 | 3 | 2 | 1 |

- Strongly agree (5)
- Somewhat agree (4)
- Neither agree nor disagree (3)
- Somewhat disagree (2)
- Strongly disagree (1)
